# Supplementary material
Source: PubMed Central journal article supplement (PMC1622794)

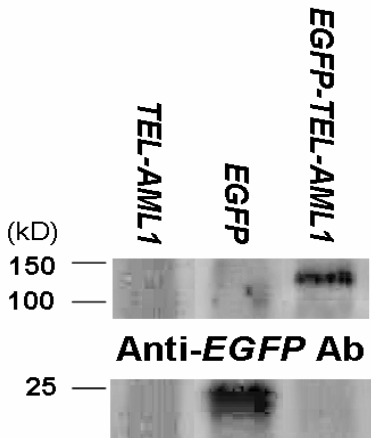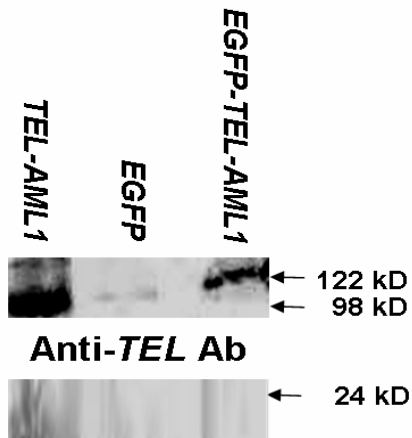

Supplement: pnas_0603349103_1.pdf [file pnas_0603349103_1.pdf]

**A**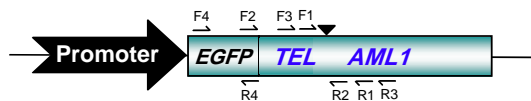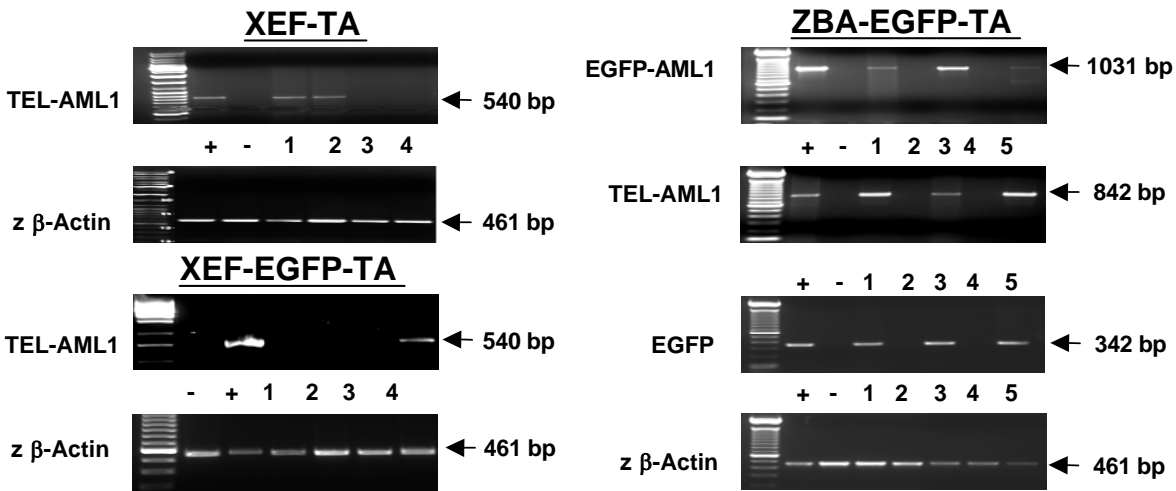**B**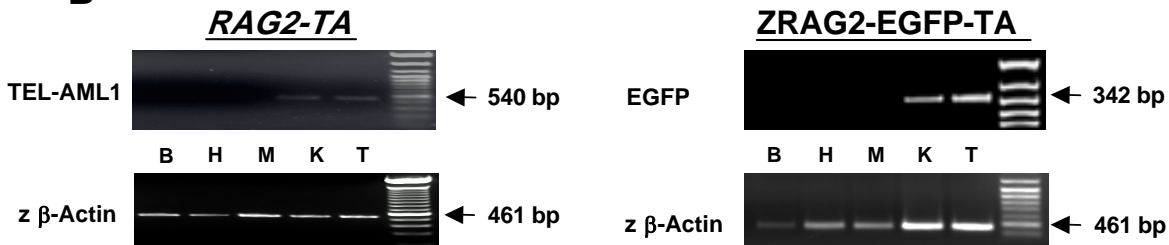

Supplement: pnas_0603349103_2.pdf [file pnas_0603349103_2.pdf]

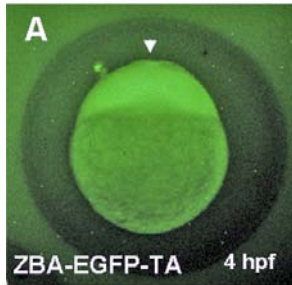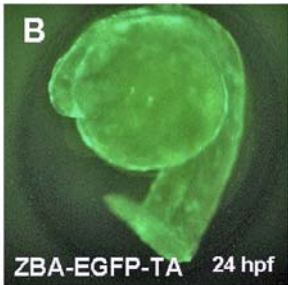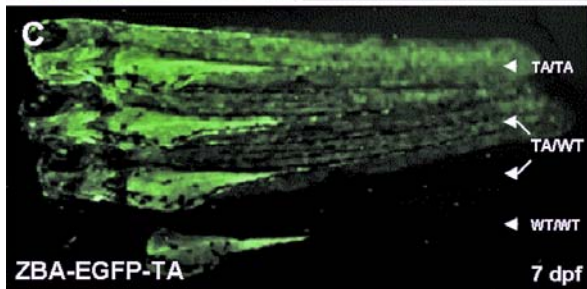

Supplement: pnas_0603349103_3.pdf [file pnas_0603349103_3.pdf]

**A****T1****T2**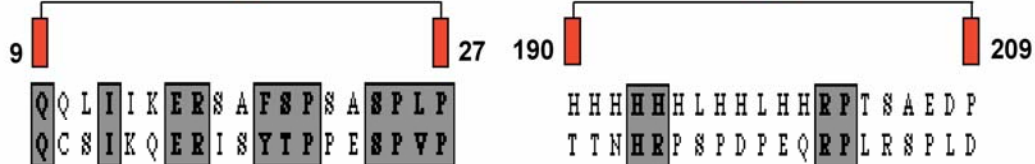**B****XEF-TA****XEF-TA****ZBA-EGFP-TA**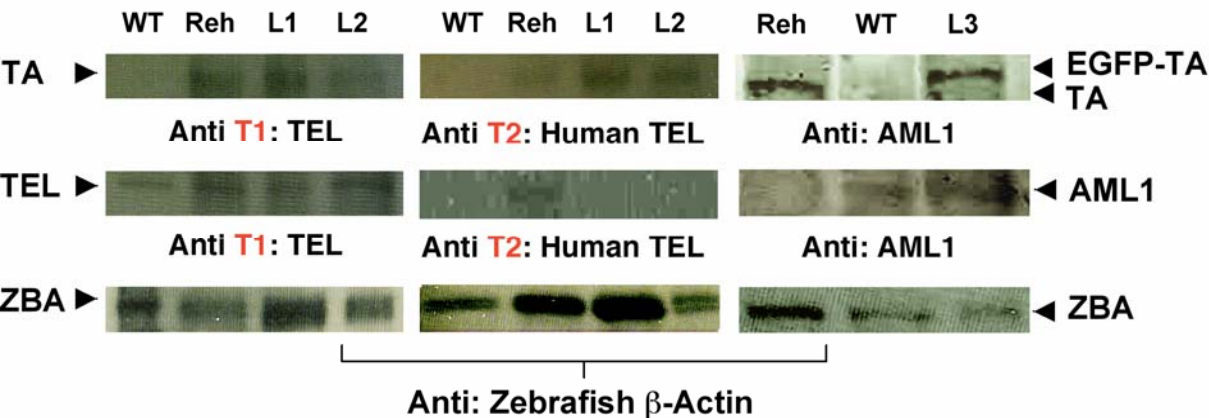

Supplement: pnas_0603349103_4.pdf [file pnas_0603349103_4.pdf]

**Donor**

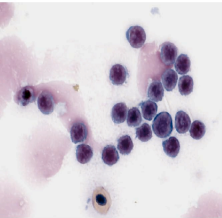

**Recipient 1**

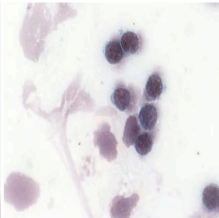

**Recipient 2**

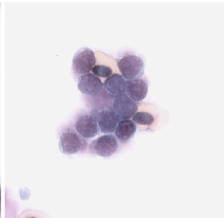

**Fig. 9**

Supplement: pnas_0603349103_5.pdf [file pnas_0603349103_5.pdf]
